# Supplementary material
Source: PubMed Central journal article supplement (PMC7278353)
Supplement: supp_RA120.012606_158172_2_supp_516496_q97lk3.pdf [file supp_RA120.012606_158172_2_supp_516496_q97lk3.pdf]

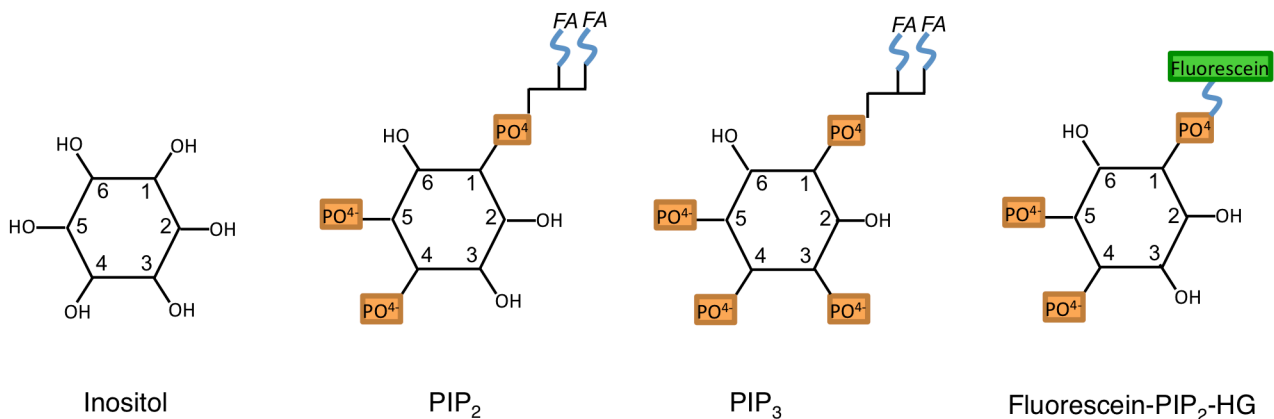

**Supplemental Figure S1. Chemical structure for the PIP<sub>2</sub> analogs used in this study.** Number indicates the carbon position within the inositol ring. Each ring has hydroxyl groups and phosphoryl groups. The latter are indicated by orange boxes at positions C1, C3, C4, and C5. Inositol, left, a binding control, has no phosphoryl groups. The glycerol-fatty acid groups, indicated by the blue lines labeled “FA”, and fluorescein, indicated by the green box, are attached to the C1 phosphoryl group of PIP<sub>2</sub>, PIP<sub>3</sub> and the labeled headgroup of PIP<sub>2</sub>, Fluorescein-PIP<sub>2</sub>-HG. Schematics are not to scale. Inositol and the unlabeled PIP<sub>2/3</sub> analogs were used in SSIF spectroscopy experiments, and Fluorescein-PIP<sub>2</sub>-HG was used for MST experiments.

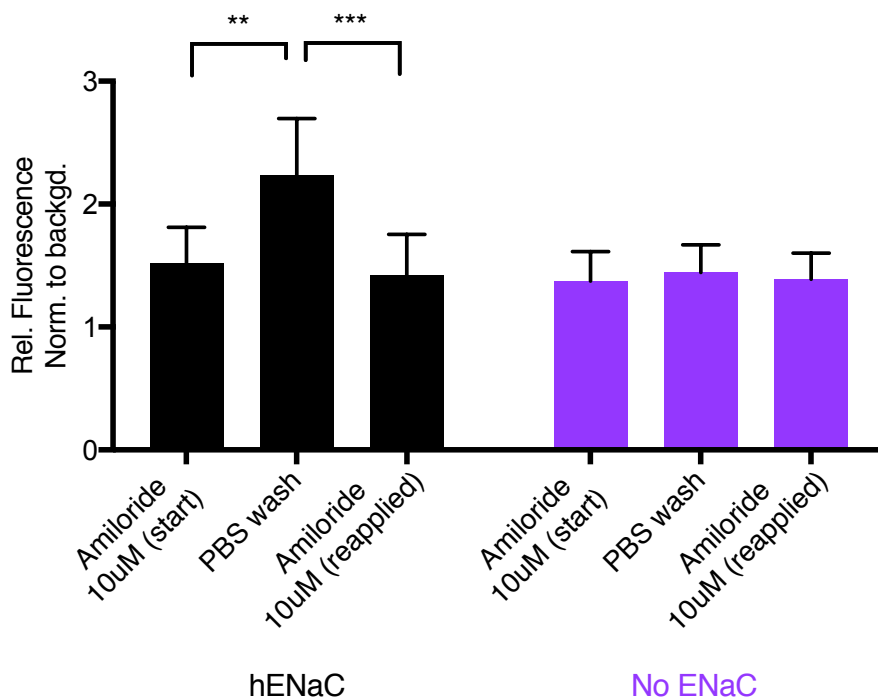

**Supplemental Figure S2. Fluorescence imaging data of CoroNa Green levels.** Relative fluorescence of cells containing CoroNa Green in the presence (black bars) and absence (purple bars) of eCFP-ENaC. Data represent cells that were first imaged in 10  $\mu$ M amiloride, followed by PBS without amiloride and 10  $\mu$ M amiloride reapplied to the cells. Data represent n=10-12 cells for each condition,  $\pm$ SD. Significance determined by two-way ANOVA followed by Dunnett's t-test compared to 10  $\mu$ M PBS + hENaC ; \*\*p<0.005; \*\*\* p<0.0001.

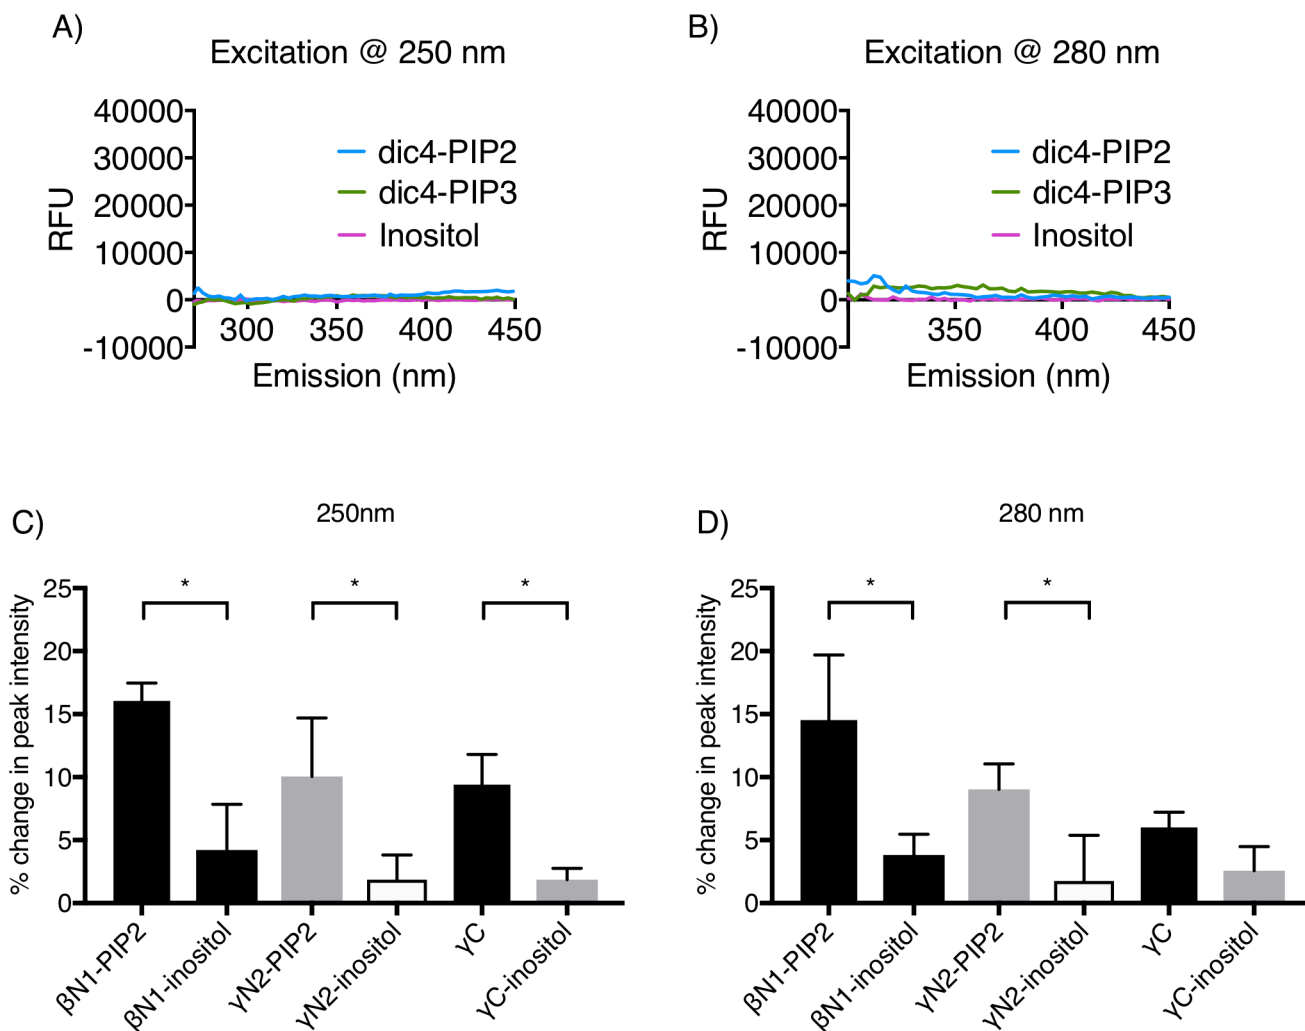

**Supplemental Figure S3. Steady state intrinsic fluorescence data for phosphoinositides.**

Emission spectra in response to excitation at 250 nm (A) and 280 nm (B) for 10  $\mu$ M diC4-PIP<sub>2</sub> (cyan), diC4-PIP<sub>3</sub> (green) and inositol (pink). C, D. A comparison of the changes in peak intensities of  $\beta$ N1,  $\gamma$ N2 and  $\gamma$ C peptides in response to diC4-PIP<sub>2</sub> with changes after addition of the binding control, 10  $\mu$ M inositol. No significant difference was noted between peaks of peptide and peptide + inositol. Data are expressed as the mean % change in peak  $\pm$ SD and represent n=3, where \*, p<0.05.

|                                                                                                                                                     |    | <a href="#">Template alignment</a> | <a href="#">Template 3D Structure</a> | <a href="#">PDBe</a>       |
|-----------------------------------------------------------------------------------------------------------------------------------------------------|----|------------------------------------|---------------------------------------|----------------------------|
| <b>1. 6AVE_B Acid-sensing ion channel 1; Ion channel, ASIC, ASIC1a, Sodium; HET: NAG;{Gallus gallus}; Related PDB entries: 6AVE_C 6AVE_A</b>        |    |                                    |                                       |                            |
| Probability: 92.52%, E-value: 0.0086, Score: 41.07, Aligned cols: 33, Identities: 15%, Similarity: 0.253,                                           |    |                                    |                                       |                            |
| Q ss_pred                                                                                                                                           |    | C                                  | HHHHHHHh                              | CCCCCeeEEe--CCccccC        |
| Q Q_8704195                                                                                                                                         | 20 | Y                                  | TYKELLVWYCDNTN                        | HGPKRIICE--GPKKAMW 52 (52) |
| Q Consensus                                                                                                                                         | 20 | ~S                                 | ~EL~fC~NTt~HG~RiV~s--n~lKt~W          | 52 (52)                    |
|                                                                                                                                                     |    |                                    | .+.++++.  . +   -.+ +. . .++++        |                            |
| T Consensus                                                                                                                                         | 13 | ~                                  | ~~~~~F~~~~tsihGlni~~~~~pi~W           | 47 (527)                   |
| T 6AVE_B                                                                                                                                            | 13 | S                                  | GQPVSIIQAFASSTLHGISHIFSYERLSLKR       | VW 47 (527)                |
| T ss_dssp                                                                                                                                           |    |                                    | -----CHHHHHH                          |                            |
| T ss_pred                                                                                                                                           |    | c                                  | CCCCcHHHHHHHcCcccHHHHh                | CCCCcHHHHHH                |
| <b>2. 5TTT_A Degenerin mec-4; Structural Genomics, PSI-Biology, Northeast Structural; NMR {Caenorhabditis elegans}; Related PDB entries: 2K2B_A</b> |    |                                    |                                       |                            |
| Probability: 75.61%, E-value: 2.1, Score: 28.1, Aligned cols: 21, Identities: 24%, Similarity: 0.311,                                               |    |                                    |                                       |                            |
| Q ss_pred                                                                                                                                           |    | C                                  | HHHHHHHh                              | CCCCCeeE                   |
| Q Q_8704195                                                                                                                                         | 21 | T                                  | YKELLVWYCDNTN                         | HGPKRI 41 (52)             |
| Q Consensus                                                                                                                                         | 21 | S                                  | ~EL~fC~NTt~HG~Ri                      | 41 (52)                    |
|                                                                                                                                                     |    |                                    | +++..+=  .. +  -+                     |                            |
| T Consensus                                                                                                                                         | 79 | r                                  | i~whlKeFC~KTSsHGIPmI                  | 99 (111)                   |
| T 5TTT_A                                                                                                                                            | 79 | R                                  | LAWHFKEFCYKTSAHGIPMI                  | 99 (111)                   |
| T ss_dssp                                                                                                                                           |    | H                                  | HHCCCCCCCCCCCCSS                      |                            |
| T ss_pred                                                                                                                                           |    | h                                  | HHHHHHHHHh                            | chhCCCCc                   |

**Supplemental Figure S4. HHPred analysis of  $\beta$ -ENaC.** HHPred analysis indicates that the amino terminus of  $\beta$ -ENaC is similar to that of ASIC and Mec-4. Positions with a red H indicate the regions with helical propensity, suggesting that the amino terminus of  $\beta$ -ENaC may be helical.

Table S1

Table S1: Peptide sequences of proposed PIP<sub>2</sub> binding sites of ENaC.

| Peptide name | Pochynyuk et al 2007 corresponding site: | Amino Acid Sequence             |
|--------------|------------------------------------------|---------------------------------|
| βN1          | βND                                      | MHVKKYLLKGLHRLQKGPGYTYKELLVWY   |
| βN1mutant    | βND                                      | MHVEEYLLKGLHELQEGPGYTYKELLVWY   |
| βN2          | β1D                                      | TNTHGPKRIICEGPKKKAMW            |
| βC           | β2D                                      | KLVALAKSLRQRRASQASYAG           |
| γN1          | γNS                                      | MAPGEKIKAKIKKNLPVTGPQAPTIKELMRW |
| γN2          | γ1D                                      | TNTHGCRRIVVSRGRLRLLW            |
| γN2mutant    | γ1D                                      | TNTHGC EEIVVSRGELELLW           |
| γC           | γ2D                                      | ARRQWQKAKEWAWKQA                |
| γCmutant     | γ2D                                      | AEEQWQEAEWAWKQA                 |
